# Supplementary material for: Cooperative fabrication of ternary nanofibers with remarkable solvent and temperature resistance by electrospinning
Source: Royal Society of Chemistry journal article supplement (doi:10.1039/c4ra03633f), 2014-01-01
Supplement: c4ra03633f1.pdf [file c4ra03633f1.pdf]

### Supporting Information for

## Cooperative Fabrication of Ternary Nanofibers with Remarkable Solvent and Temperature Resistance by Electrospinning

*Chang Liu<sup>a</sup>, Yi-nan Wu<sup>a\*</sup>, Aimin Yu<sup>b\*</sup>, Fengting Li<sup>a</sup>*

<sup>a</sup> College of Environmental Science and Engineering, State Key Laboratory of Pollution Control and Resource Reuse, Tongji University, 200092 Shanghai, China. E-mail: 51n@tongji.edu.cn; Fax: +86 21 65985059; Tel: +86 21 65980567

<sup>b</sup> Faculty of Science, Engineering and Technology, Swinburne University of Technology, Hawthorn, Vic. 3122, Australia. E-mail: aiminyu@swin.edu.au

Table. S1 Solvents and temperatures used for stability tests.

| Temperature | Solvents                              |
|-------------|---------------------------------------|
| 60°C        | H <sub>2</sub> O, DMF, EtOH, n-hexane |
| 80°C        | H <sub>2</sub> O, DMF, EtOH, n-hexane |
| 100°C       | H <sub>2</sub> O, DMF, EtOH           |
| 120°C       | H <sub>2</sub> O, EtOH                |
| 150°C       | DMF                                   |
| 200°C       | DMF                                   |

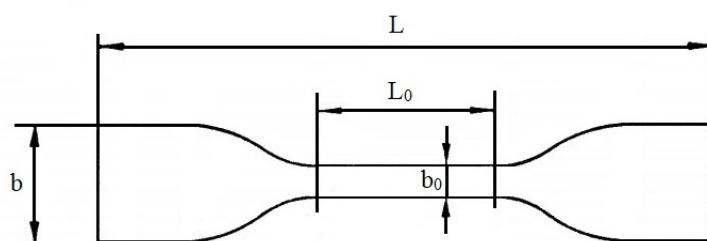

Fig. S1 Size of the dumbbell-shape sample in the mechanical property tests:

$$L = 115 \text{ mm}, L_0 = 33 \text{ mm}, b = 25 \text{ mm}, b_0 = 6 \text{ mm}$$

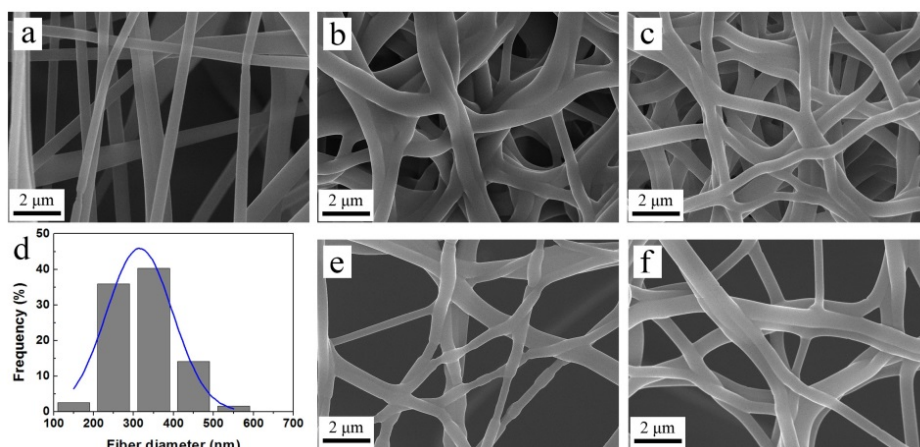

Fig. S2 SEM images of (a) the as prepared N-0 nanofibers and after immersed in (b) H<sub>2</sub>O, (c) DMF, (e) EtOH, (f) MeOH for 24 h at room temperature. (d) The diameter distribution of the as prepared N-0 nanofibers and the Gauss fitting curve.

Study of the electrospinning parameters:

In order to find out the optimal electrospinning parameters, different voltage (16, 18, 20, 22 kV) and the distance from needle to collector (13, 14, 15, 16 cm) were tried. Fig. S3 shows the typical SEM images of the nanofibers prepared under different parameters.

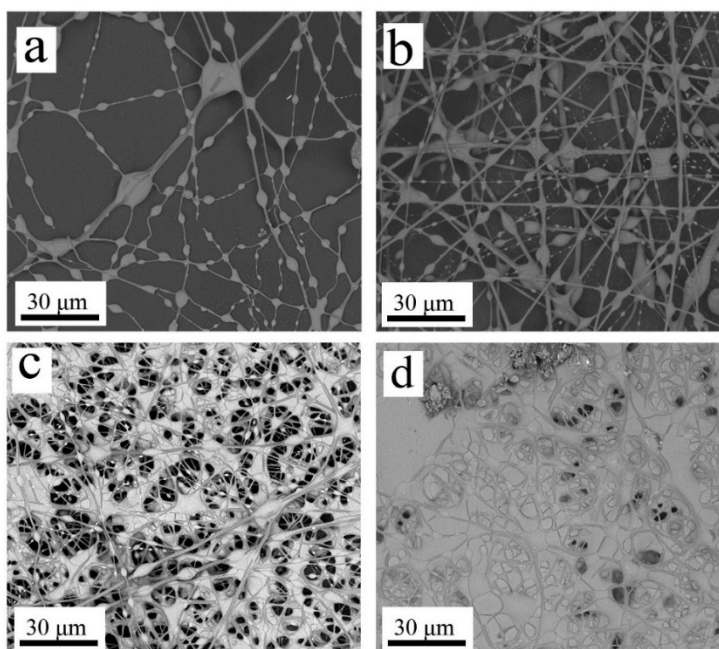

Fig. S3 The SEM images show morphology of the nanofibers prepared under different parameters: (a) 22 kV, 14 cm; (b) 16 kV, 14 cm; (c) 20 kV, 16 cm, (d) 20 kV, 13 cm.

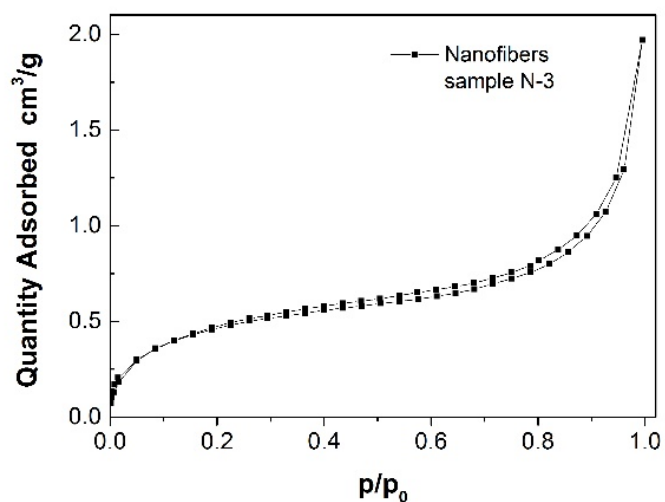

Fig. S4 N<sub>2</sub> adsorption–desorption analysis of the prepared composite nanofibers

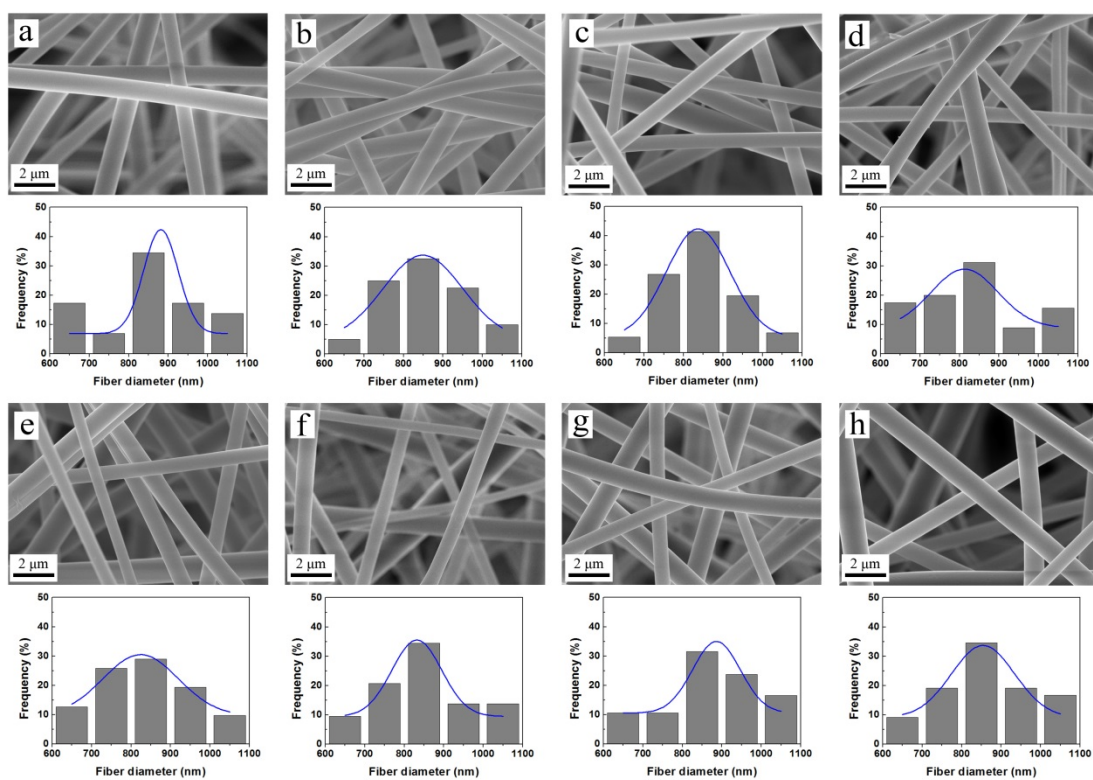

Fig. S5 SEM images of sample N-3 immersed in (a) H<sub>2</sub>O, (b) DMF, (c) EtOH, (d) THF, (e) MeOH, (f) CHCl<sub>3</sub>, (g) n-hexane, (h) acetone for 48 h at room temperature. The curve in diameter distribution is the Gauss fitting of the figure.

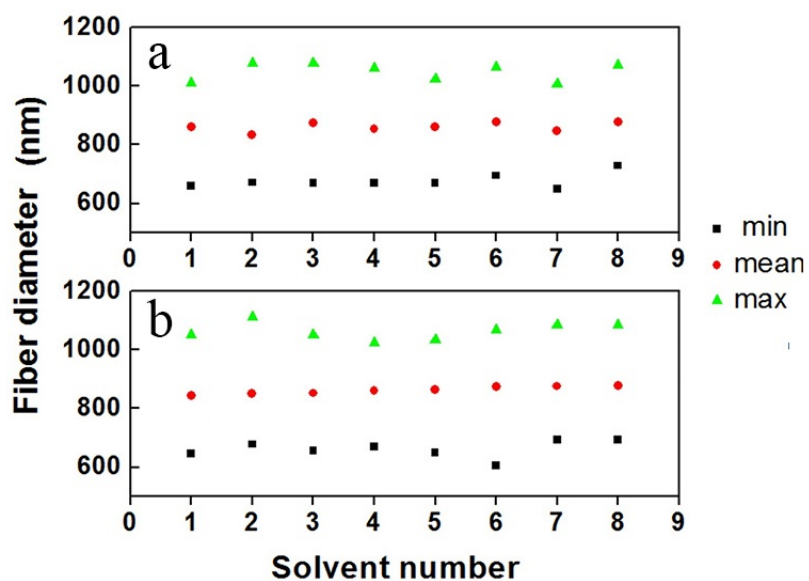

Fig. S6 The minimum, maximal and mean diameters of sample N-3 after immersed in different solvents for (a) 24 h and (b) 48 h at room temperature. Solvent number: (1) H<sub>2</sub>O, (2) DMF, (3) EtOH, (4) THF, (5) MeOH, (6) CHCl<sub>3</sub>, (7) n-hexane, (8) acetone.

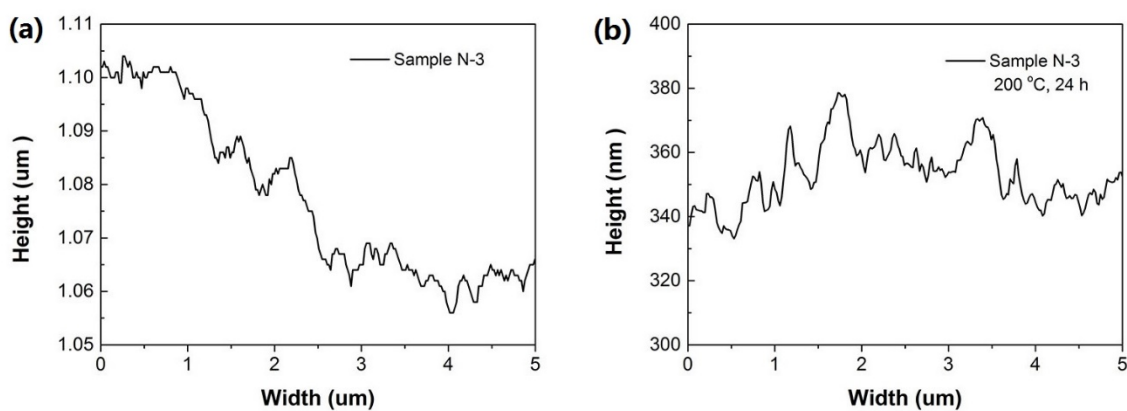

Fig. S7 The image profile (a) sample N-3, (b) sample N-3 immersed in DMF 200°C for 24 h.
